# Supplementary material for: Greenhouse gas emissions and reactive nitrogen releases from rice productionwith simultaneous incorporation of wheat straw and nitrogen fertilizer
Source: Copernicus journal article supplement (doi:10.5194/bg-13-4569-2016), 2016-08-12
Supplement: Supplementary file 1 [file bg-13-4569-2016-supplement.pdf]

Supplement of Biogeosciences, 13, 4569–4579, 2016  
<http://www.biogeosciences.net/13/4569/2016/>  
doi:10.5194/bg-13-4569-2016-supplement  
© Author(s) 2016. CC Attribution 3.0 License.

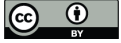

Biogeosciences  Open Access

*Supplement of*

## **Greenhouse gas emissions and reactive nitrogen releases from rice production with simultaneous incorporation of wheat straw and nitrogen fertilizer**

**Longlong Xia et al.**

*Correspondence to:* Xiaoyuan Yan (yanxy@issas.ac.cn)

The copyright of individual parts of the supplement might differ from the CC-BY 3.0 licence.

1 **Various Nr losses empirical models established through meta-analysis of**

2 **published papers.** We conducted a detailed review of published literature to simulate

3 various Nr losses response to N fertilization for rice production in the TLR. An

4 exhaustive survey of literature published in peer-reviewed journals was launched

5 using the Google Scholar, ISI web of knowledge and China Knowledge Resource

6 Integrated database to identify articles published before April 2015. This survey

7 focused on field observation of various Nr losses from rice production in the TLR,

8 including NH<sub>3</sub> volatilization, N leaching and runoff, and N<sub>2</sub>O emission. Several

9 criteria were established to ensure studies included in dataset being representative.

10 First, field measurements must be carried out during rice cultivation in the TLR.

11 Second, observation methods of various Nr should be authoritative and widely-agreed.

12 For example, N<sub>2</sub>O emission must be measured using static chamber technique (Xia et

13 al., 2014), NH<sub>3</sub> volatilization must be observed by dynamic chamber method or

14 micrometeorological method (Zhao et al., 2015) and N leaching and runoff must be

15 measured using lysimeter method or suction cap (Xue et al., 2014, Zhao et al., 2009).

16 Third, observation duration must be covered main Nr discharge period. NH<sub>3</sub>

17 volatilization and N<sub>2</sub>O emission must be measured for at least 2 weeks after N

18 fertilization.

19 The Nr releases induced by biological N fixation (BNF) and crop residue

20 incorporation were not calculated in our study, due to the following reasons. First,

21 compared to the synthetic N fertilizer application rate, the Nr input rate through BNF

22 is minor (Ti et al., 2012). Secondly, the effects of BNF and crop residue incorporation

23 on Nr release are not significant. The high C/N ratio of crop residue generally

24 promotes the N contained in the residues to stabilize in soil rather than releasing as

25 various Nr. For example, a meta-analysis that integrated 112 scientific assessments of

26 the crop residue return on the N<sub>2</sub>O emissions has found that the practice exerted no  
27 statistically significant effect on the N<sub>2</sub>O release (Shan and Yan, 2013). And the  
28 effects of BNF on Nr release, such as N<sub>2</sub>O emission, are not considered in the new  
29 IPCC emission inventory guidelines any more (IPCC, 2013).

30

31 **Environmental costs incurred by GHG and Nr releases.** The environmental costs  
32 that our study considered referred to global warming incurred by GHG emissions, soil  
33 acidification incurred by NH<sub>3</sub> and NO<sub>x</sub> emissions and aquatic eutrophication caused  
34 by NH<sub>3</sub> emission and N leaching and runoff, mainly referred to Xia and Yan (2011)  
35 and Xia and Yan (2012) that based on method adopted by Moomaw and Birch (2005).  
36 We did not consider the direct human health damage incurred by GHG and Nr  
37 releases due to the fact that the human health damage caused by GHG and Nr releases  
38 is quite difficult to quantify directly, which is determined by people's willingness to  
39 pay and whether the location where GHG and Nr released also has high density of  
40 population (Gu et al. 2012).

41

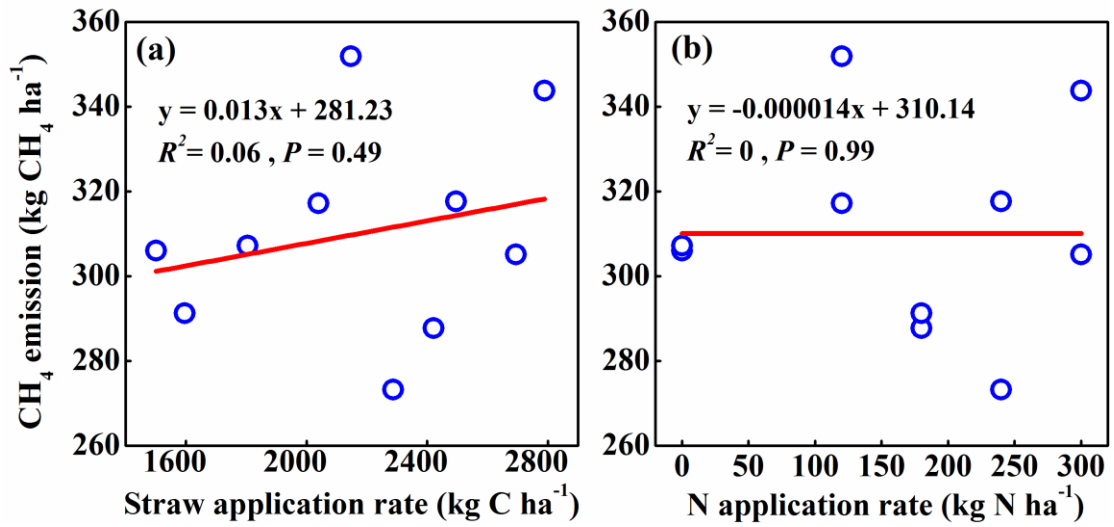

42

43 **Fig.S1. Relationship between CH<sub>4</sub> emissions and (a) straw incorporation rate**  
44 **and (b) N fertilizer application rate for rice production in rice-wheat cropping**  
45 **system in the TLR**

46

47

48

49

50

51

52

53

54

55

56

57

58

59

60 **References:**

- 61 Gu B, Ge Y, Ren Y, Xu B, Luo W, Jiang H, Gu B Chang (2012) Atmospheric reactive  
62 nitrogen in China: Sources, recent trends, and damage costs. *Environment*  
63 *science & technology*, **46**, (17), 9420-9427.
- 64 IPCC (2013) *Climate change 2013: The Physical Science Basis*. Cambridge  
65 University press, Cambridge, United Kingdom and New York, NY, USA.
- 66 Moomaw W, Brich MBL (2005) Cascading costs: An economic nitrogen cycle.  
67 *Science in China Series C: Life Sciences*, **48**(2), 678-696.
- 68 Ti C, Pan J, Xia Y, Yan X (2012) A nitrogen budget of mainland China with spatial  
69 and temporal variation. *Biogeochemistry*, **108**, 381-394.
- 70 Shan J, Yan, X (2013) Effects of crop residue returning on nitrous oxide emissions in  
71 agricultural soils. *Atmospheric Environment*, **71**, 170-175.
- 72 Xia L, Wang S, Yan X (2014) Effects of long-term straw incorporation on the net  
73 global warming potential and the net economic benefit in a rice–wheat cropping  
74 system in China. *Agriculture, Ecosystems & Environment*, **197**, 118-127.
- 75 Xia Y, Yan X (2011) Life-cycle evaluation of nitrogen-use in rice-farming systems:  
76 implications for economically-optimal nitrogen rates. *Biogeosciences*, **8**,  
77 3159-3168.
- 78 Xia Y, Yan X (2012) Ecologically optimal nitrogen application rates for rice cropping  
79 in the Taihu Lake region of China. *Sustainability Science*, **7**, (1), 33-44.
- 80 Xue L, Yu Y, Yang L (2014) Maintaining yields and reducing nitrogen loss in rice–  
81 wheat rotation system in Taihu Lake region with proper fertilizer management.  
82 *Environmental Research Letters*, **9**, 115010.
- 83 Zhao M, Tian Y, Ma Y, Zhang M, Yao Y, Xiong Z, Yin B, Zhu Z (2015) Mitigating  
84 gaseous nitrogen emissions intensity from a Chinese rice cropping system

85 through an improved management practice aimed to close the yield gap.  
86 Agriculture, Ecosystems & Environment, **203**, 36-45.

87 Zhao X, Xie Y, Xiong Z, Yan X, Xing G, Zhu Z (2009) Nitrogen fate and  
88 environmental consequence in paddy soil under rice-wheat rotation in the Taihu  
89 lake region, China. Plant and soil, **319**, 225-234.

90
